# Supplementary material for: What does the HOMA index really measure?
Source: Royal Society of Chemistry journal article supplement (doi:10.1039/c4ra06652a), 2014-01-01
Supplement: c4ra06652a1.pdf [file c4ra06652a1.pdf]

# Electronic Supplementary Information to

## What does the *HOMA* index really measure?

by Sławomir Ostrowski and Jan Cz. Dobrowolski

| MOLECULE                                                                            | HOMA   | HOMA( $\rho$ ) | HOMA(V) | HOMA(G) | HOMA(K) |
|-------------------------------------------------------------------------------------|--------|----------------|---------|---------|---------|
|    | 1.000  | 1.000          | 1.000   | 1.000   | 1.000   |
|    | -4.099 | -0.160         | -5.525  | 0.524   | -2.476  |
|    | -1.485 | 0.384          | -3.062  | 0.654   | -1.045  |
|   | -0.740 | 0.549          | -2.088  | 0.734   | -0.555  |
|  | -3.098 | 0.028          | -4.724  | 0.561   | -2.008  |
|  | -4.821 | -0.317         | -6.066  | 0.513   | -2.844  |
|  | -5.353 | -0.417         | 0.084   | 0.374   | 0.084   |
|  | -4.327 | -0.229         | 0.009   | 0.049   | 0.009   |
|  | 0.833  | 0.956          | 0.627   | 0.966   | 0.818   |
|  | 0.985  | 0.997          | 0.975   | 0.998   | 0.986   |
|  | 0.993  | 0.998          | 0.989   | 0.999   | 0.992   |
|  | -1.575 | 0.379          | -3.070  | 0.656   | -1.058  |
|  | -1.639 | 0.364          | -3.098  | 0.658   | -1.083  |

|                                                                                     |        |        |        |       |        |
|-------------------------------------------------------------------------------------|--------|--------|--------|-------|--------|
| 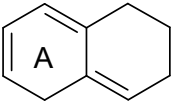   | -0.847 | 0.529  | -2.233 | 0.719 | -0.614 |
|    | -1.618 | 0.370  | -3.080 | 0.659 | -1.073 |
|    | -1.474 | 0.389  | -3.296 | 0.611 | -1.113 |
|    | -1.553 | 0.398  | -2.970 | 0.667 | -1.012 |
|    | -1.481 | 0.392  | -3.003 | 0.656 | -1.012 |
|    | -4.197 | -0.160 | -5.515 | 0.531 | -2.487 |
|    | -2.411 | 0.182  | -4.065 | 0.594 | -1.613 |
|   | -2.895 | 0.097  | -4.455 | 0.573 | -1.839 |
|  | -2.820 | 0.119  | -4.375 | 0.576 | -1.789 |
|  | -2.919 | 0.091  | -4.494 | 0.570 | -1.859 |
|  | -2.250 | 0.233  | -3.674 | 0.633 | -1.428 |
|  | 0.833  | 0.956  | 0.627  | 0.966 | 0.818  |
|  | -1.370 | 0.423  | -2.677 | 0.699 | -0.878 |
|  | -1.399 | 0.404  | -2.969 | 0.659 | -0.992 |
|  | -2.461 | 0.171  | -4.068 | 0.599 | -1.628 |
|  | -2.342 | 0.199  | -3.986 | 0.599 | -1.568 |

|                                                                                     |        |        |        |       |        |
|-------------------------------------------------------------------------------------|--------|--------|--------|-------|--------|
| 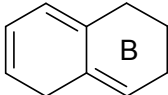   | -2.102 | 0.255  | -3.537 | 0.640 | -1.349 |
|    | -3.693 | -0.079 | -5.123 | 0.554 | -2.265 |
|    | -3.824 | -0.112 | -5.230 | 0.550 | -2.333 |
|    | -4.191 | -0.164 | -5.540 | 0.528 | -2.497 |
|    | -2.690 | 0.129  | -4.215 | 0.589 | -1.709 |
|    | -4.081 | -0.146 | -5.463 | 0.532 | -2.451 |
|    | -2.904 | 0.088  | -4.483 | 0.567 | -1.847 |
|   | -2.895 | 0.097  | -4.455 | 0.573 | -1.839 |
|  | -2.878 | 0.102  | -4.439 | 0.573 | -1.829 |
|  | -2.919 | 0.091  | -4.494 | 0.570 | -1.859 |
|  | -2.796 | 0.117  | -4.276 | 0.589 | -1.749 |
|  | 0.700  | 0.920  | 0.330  | 0.938 | 0.675  |
|  | 0.789  | 0.949  | 0.611  | 0.968 | 0.802  |
|  | 0.700  | 0.920  | 0.330  | 0.938 | 0.675  |
|  | 0.907  | 0.976  | 0.796  | 0.983 | 0.896  |
|  | 0.568  | 0.885  | 0.079  | 0.920 | 0.541  |

|                                                                                     |       |       |        |       |       |
|-------------------------------------------------------------------------------------|-------|-------|--------|-------|-------|
| 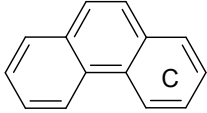   | 0.907 | 0.976 | 0.796  | 0.983 | 0.896 |
|    | 0.888 | 0.970 | 0.750  | 0.979 | 0.875 |
|    | 0.661 | 0.909 | 0.274  | 0.939 | 0.633 |
|    | 0.661 | 0.909 | 0.274  | 0.939 | 0.633 |
|    | 0.888 | 0.970 | 0.750  | 0.979 | 0.875 |
|    | 0.934 | 0.982 | 0.854  | 0.989 | 0.922 |
|   | 0.934 | 0.982 | 0.854  | 0.989 | 0.922 |
|  | 0.934 | 0.982 | 0.854  | 0.989 | 0.922 |
|  | 0.271 | 0.813 | -0.352 | 0.891 | 0.307 |
